# Supplementary material for: Coactosin-like 1 integrates signaling critical for shear-dependent thrombus formation in mouse platelets
Source: PubMed Central journal article supplement — Haematologica. 2019 Oct 3;105(6):1667–76. doi: 10.3324/haematol.2019.225516 (PMC7271572; doi:10.3324/haematol.2019.225516), 2020-06
Supplement: 2019_225516-Disclosures_and_Contributions.pdf [file 2019_225516-Disclosures_and_Contributions.pdf]

Haematologica  
HAEMATOL/2019/225516  
Version 3

Coactosin-like 1 integrates signaling critical for shear-dependent  
thrombus formation in mouse platelets

Inga Scheller, Simon Stritt, Sarah Beck, Bing Peng, Irina Pleines, Katrin  
G. Heinze, Attila Braun, Oliver Otto, Robert Ahrends, Albert Sickmann,  
Markus Bender, and Bernhard Nieswandt

Disclosures: Oliver Otto is cofounder of Zellmechanik Dresden distributing real-time deformability cytometry. The other authors declare no competing financial interests.

Contributions: IS, SS, SB, BP and MB acquired data. KGH, RA, AS and OO provided essential tools and interpreted data. BN designed the research. IS, SS, IP, MB and BN analyzed data and wrote the manuscript.
